# Supplementary material for: Maternal Supplementation with a Cocoa Extract during Lactation Deeply Modulates Dams’ Metabolism, Increases Adiponectin Circulating Levels and Improves the Inflammatory Profile in Obese Rat Offspring
Source: MDPI journal article supplement (doi:10.3390/nu14235134), 2022-12-03
Supplement: s1 [file s1]

**Table S1.** Nucleotide sequences of primers used for real-time quantitative PCR.

| Gene                             | Forward primer (5' to 3') | Reverse primer (5' to 3') |
|----------------------------------|---------------------------|---------------------------|
| <i>Acc1</i>                      | TGCAGGTATCCCCACTCTTC      | TTCTGATTCCCTTCCCTCCT      |
| <i>Acc2</i>                      | TCCTTTCAGACCTCCTCTCG      | GATAACCCTGTTGCCTCCAA      |
| <i>Adipoq</i>                    | GTTCCAGGACTCAGGATGCT      | CGTCTCCCTTCTCTCCCTTC      |
| <i>Adipor1</i>                   | TCTCCATCGTCTGTGTCTG       | AATCCGAGCAGCATAAAAGGC     |
| <i>Adipor2</i>                   | AGCCATTCTCTGCCTTTCCT      | ACATGTCCCACTGAGAGACG      |
| <i>Atgl</i>                      | CACTTTAGCTCCAAGGATGA      | TGGTTCAGTAGGCCATTCT       |
| <i><math>\beta</math>-actin</i>  | TACAGCTTCACCACCACAGC      | TCTCCAGGGAGGAAGAGGAT      |
| <i>Cd36</i>                      | GTCCTGGCTGTGTTTGA         | GCTCAAAGATGGCTCCATTG      |
| <i>Cd74</i>                      | CCACCTAAAGAGCCACTGGA      | AGGGACGGTGAAGCAGATAC      |
| <i>Cpt1<math>\alpha</math></i>   | GCTCGCACATTACAAGGACAT     | TGGACACCACATAGAGGCAG      |
| <i>Cpt1<math>\beta</math></i>    | GCAAACCTGGACCGAGAAGAG     | CCTTGAAGAAGCGACCTTTG      |
| <i>Dgat1</i>                     | CAGACAGCGGTTTCAGCAAT      | AGGGGTCTTCAGAAACAGAG      |
| <i>DsbA-L</i>                    | GCTTCACGTTTCGCTTCTCTC     | GCCGCAACTTCAGCTTGATA      |
| <i>Emr1</i>                      | GATGTGGAGGATGGGAGATG      | GCACGAAACAACAGGAAGGT      |
| <i>Ero1-L<math>\alpha</math></i> | TGTCAAACCCTGCCATTCTG      | TCCACATACTCAGCATCGGG      |
| <i>Fas</i>                       | CGGCGAGTCTATGCCACTAT      | ACACAGGGACCGAGTAATGC      |
| <i>Gpat</i>                      | CAGCGTGATTGCTACCTGAA      | CTCTCCGTCCTGGTGAGAAG      |
| <i>Had</i>                       | ATCGTGAACCGTCTCTTGGT      | AGGACTGGGCTGAAATAAGG      |
| <i>Hprt</i>                      | TCCCAGCGTCGTGATTAGTGA     | CCTTCATGACATCTCGAGCAAG    |
| <i>Hsl</i>                       | TCACGCTACATAAAGGCTGCT     | CCACCCGTAAAGAGGGAAC       |
| <i>Il10</i>                      | ACCTGGTAGAAGTGATGCCC      | GCTCCACTGCCTTGCTTTTA      |
| <i>iNOS</i>                      | GGCAGCTACTGGGTCAAAGA      | TCTGAGGGCTGACACAAGG       |
| <i>Mcp1</i>                      | AGGCAGATGCAGTTAATGCCC     | ACACCTGCTGCTGGTGATTCTC    |
| <i>Mgl1</i>                      | CTCCAACACCAAGGCTGAAC      | GGTCTTCAAGTCCTTCCCCA      |
| <i>Mrc1</i>                      | CTGCAAGGAAGGTTGGCATT      | CAGGCGTTGAAAGTGAGTC       |
| <i>Ppara<math>\alpha</math></i>  | GTGGCTGCTATAATTTGCTGTG    | AGCTTCGGGAAGAGAAAGGTAT    |
| <i>Ppia</i>                      | CCAAACACAAATGGTTCCCAGT    | ATTCTGGACCCAAAACGCT       |
| <i>Tfrc</i>                      | ATCATCAAGCAGCTGAGCCAG     | CTCGCCAGACTTTGCTGAATTT    |
| <i>Tnfa</i>                      | TGCCTCAGCCTCTTCTCATT      | GCTTGGTGGTTTGCTACGAC      |

Primer pairs for PCR were designed using Primer3 software, and the sequence information was obtained from GenBank. *Acc1*, acetyl CoA carboxylase 1; *Acc2*, acetyl CoA carboxylase 2; *Adipoq*, adiponectin; *Adipor1*, adiponectin receptor 1; *Adipor2*, adiponectin receptor 2; *Atgl*, adipose triglyceride lipase;  *$\beta$ -actin*, actin beta; *Cd36*, fatty acid translocase, homologue of CD36; *Cd74*, major histocompatibility complex, class II invariant chain; *Cpt1 $\alpha$* , carnitine palmitoyltransferase 1 alpha; *Cpt1 $\beta$* , carnitine palmitoyltransferase 1 beta; *Dgat1*, diacylglycerol acyltransferase 1; *DsbA-L*, disulfide-bond-A oxidoreductase-like protein; *Emr1*, EGF-like module containing, mucin-like, hormone receptor-like 1; *Ero1-L $\alpha$* , endoplasmic reticulum oxidoreductin 1-like protein alpha; *Fas*, fatty acid synthase; *Gpat*, glycerol-3-phosphate acyltransferase; *Had*, hydroxyacyl-CoA dehydrogenase; *Hprt*, hypoxanthine guanine phosphoribosyl transferase; *Hsl*, hormone-sensitive lipase; *Il10*, interleukin 10; *iNOS*, nitric oxide synthase 2, inducible; *Mcp-1*, monocyte chemoattractant protein-1; *Mgl1*, C-type lectin domain family 10, member A; *Mrc1*, mannose receptor, C type 1; *Ppara $\alpha$* , peroxisome proliferator-activated receptor alpha; *Ppia*, peptidylprolyl isomerase A; *Tfrc*, transferrin receptor; *Tnfa*, tumor necrosis factor.
