# Supplementary material for: Maternal Supplementation with a Cocoa Extract during Lactation Deeply Modulates Dams’ Metabolism, Increases Adiponectin Circulating Levels and Improves the Inflammatory Profile in Obese Rat Offspring
Source: MDPI journal article supplement (doi:10.3390/nu14235134), 2022-12-03
Supplement: s1 [file s1]

**Table S2. Lipid metabolism-related parameters analyzed in dams' mammary gland by Nuclear Magnetic Resonance.**

| <i>μmols /g mammary gland</i> | VEH             | CCX             |
|-------------------------------|-----------------|-----------------|
| Free Cholesterol              | 0.059 ± 0.002   | 0.060 ± 0.003   |
| Esterified Cholesterol        | 0.004 ± 0       | 0.004 ± 0       |
| Total Cholesterol             | 0.063 ± 0.002   | 0.064 ± 0.003   |
| Triglycerides                 | 1.04 ± 0.09     | 0.82 ± 0.04 *   |
| Diglycerides                  | 0.024 ± 0.002   | 0.023 ± 0.001   |
| Monoglycerides                | 0.0005 ± 0.0001 | 0.0006 ± 0.0001 |
| Phosphatidyl Choline          | 0.17 ± 0.01     | 0.17 ± 0.01     |
| Phosphatidyl Ethanolamine     | 0.080 ± 0.004   | 0.080 ± 0.004   |
| Phosphatidyl Inositol         | 0.006 ± 0       | 0.005 ± 0       |
| Sphingomyelin                 | 0.015 ± 0.001   | 0.014 ± 0.001   |
| Plasmalogen                   | 0.017 ± 0.001   | 0.013 ± 0.002   |
| Omega-3                       | 0.069 ± 0.004   | 0.057 ± 0.003 * |
| ARA+EPA                       | 0.088 ± 0.005   | 0.089 ± 0.003   |
| Oleic acid                    | 0.72 ± 0.06     | 0.53 ± 0.03 *   |
| DHA                           | 0.008 ± 0.001   | 0.006 ± 0 *     |
| Linoleic acid                 | 1.12 ± 0.09     | 0.92 ± 0.04     |
| PUFAs (%)                     | 12.3 ± 0.9      | 13.6 ± 0.6      |
| MUFAs (%)                     | 49.1 ± 1.9      | 50.8 ± 1.6      |

Dams were fed with chow and received a daily oral dose of CCX (200 mg per kg body weight) (CCX group) or the vehicle (VEH group) during lactation (21 days). CCX, cocoanox extract; ARA+EPA, arachidonic + eicosapentaenoic acid; DHA, docosahexaenoic acid; PUFAs, polyunsaturated fatty acids; MUFAs, monounsaturated fatty acids. Data are the mean ± SEM (n=8). \* p<0.05 vs VEH group (Student's t-test).
